# Supplementary material for: Population Structure and Evidence for Both Clonality and Recombination among Brazilian Strains of the Subgenus Leishmania (Viannia)
Source: PubMed Central journal article supplement (PMC3814519; doi:10.1371/journal.pntd.0002490), 2013-10-31

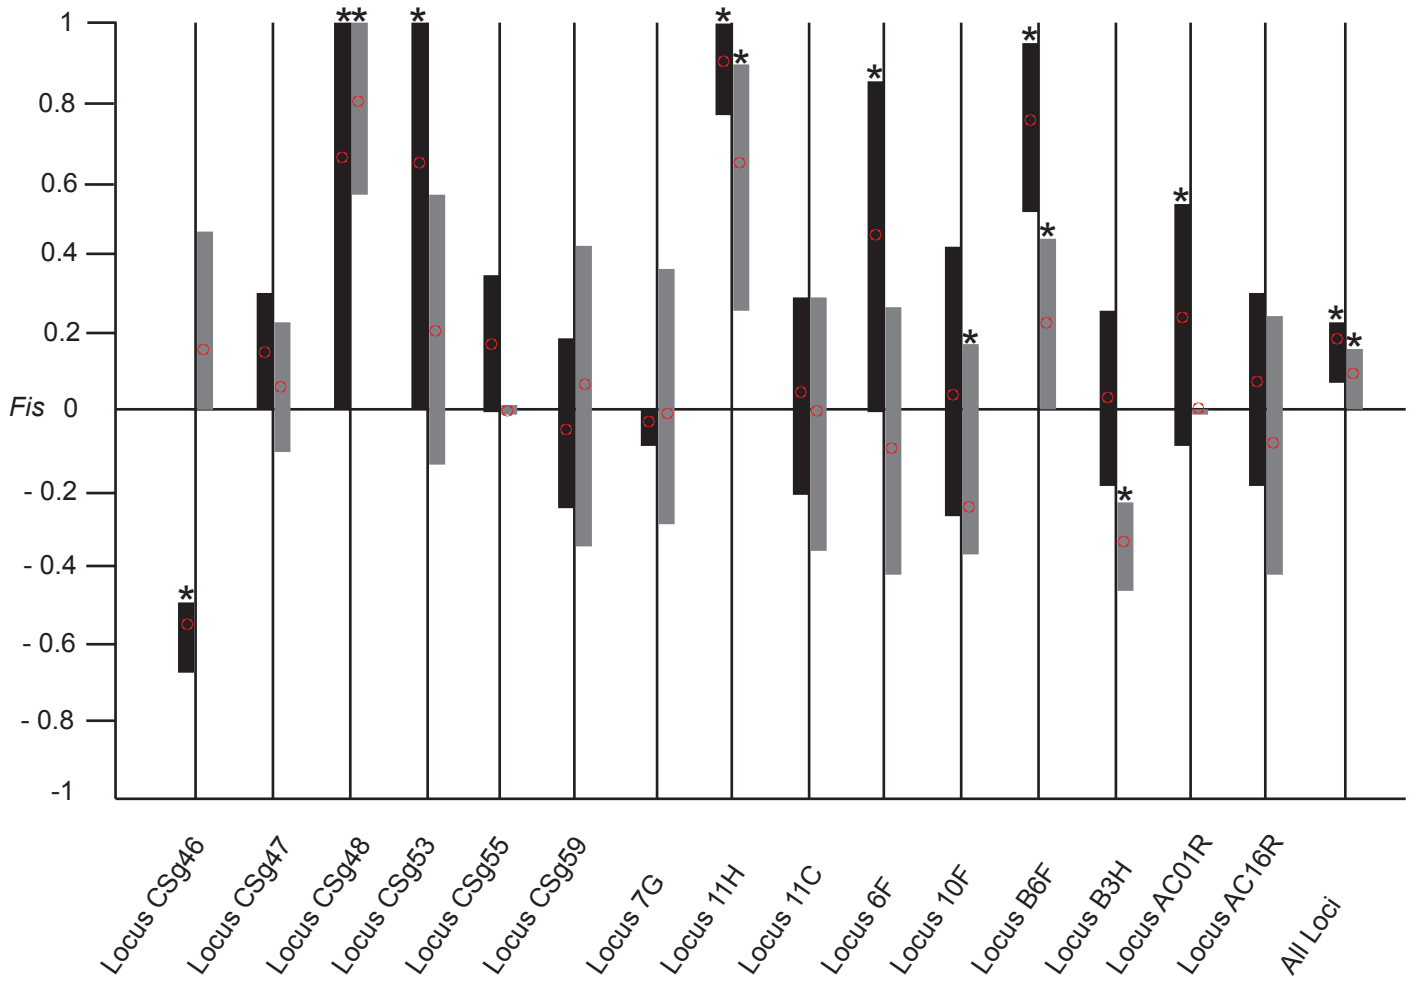

Supplement: pntd.0002490.s006.pdf [file pntd.0002490.s006.pdf]
